# Supplementary material for: A model–model and data–model comparison for the early Eocene hydrological cycle
Source: Copernicus journal article supplement (doi:10.5194/cp-12-455-2016), 2016-02-25
Supplement: Supplementary file 1 [file cp-12-455-2016-supplement.zip]

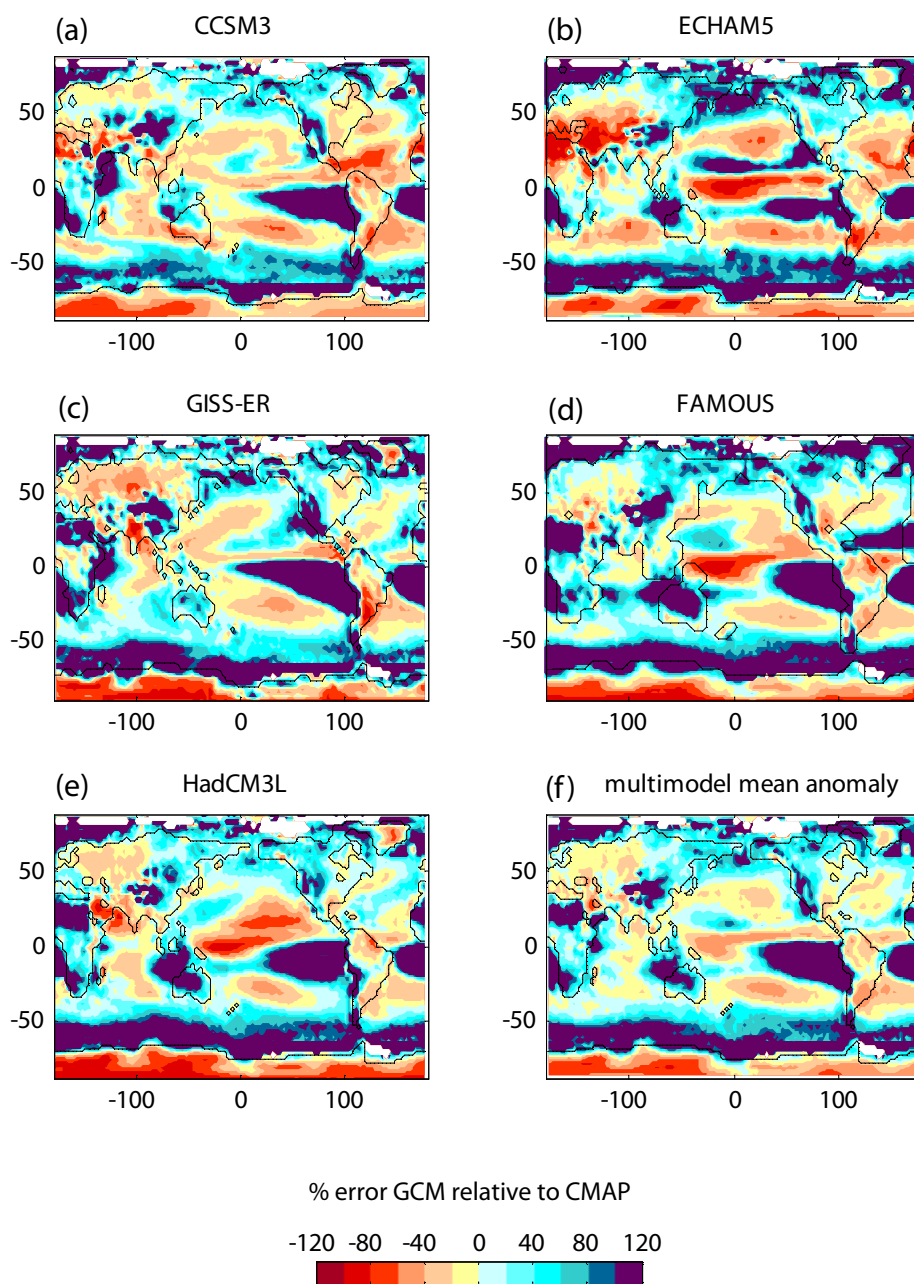

**Figure S1** Percentage error between preindustrial model simulated mean annual precipitation and CMAP observational data, calculated as  $(\text{model-observations})/\text{observations} \times 100\%$

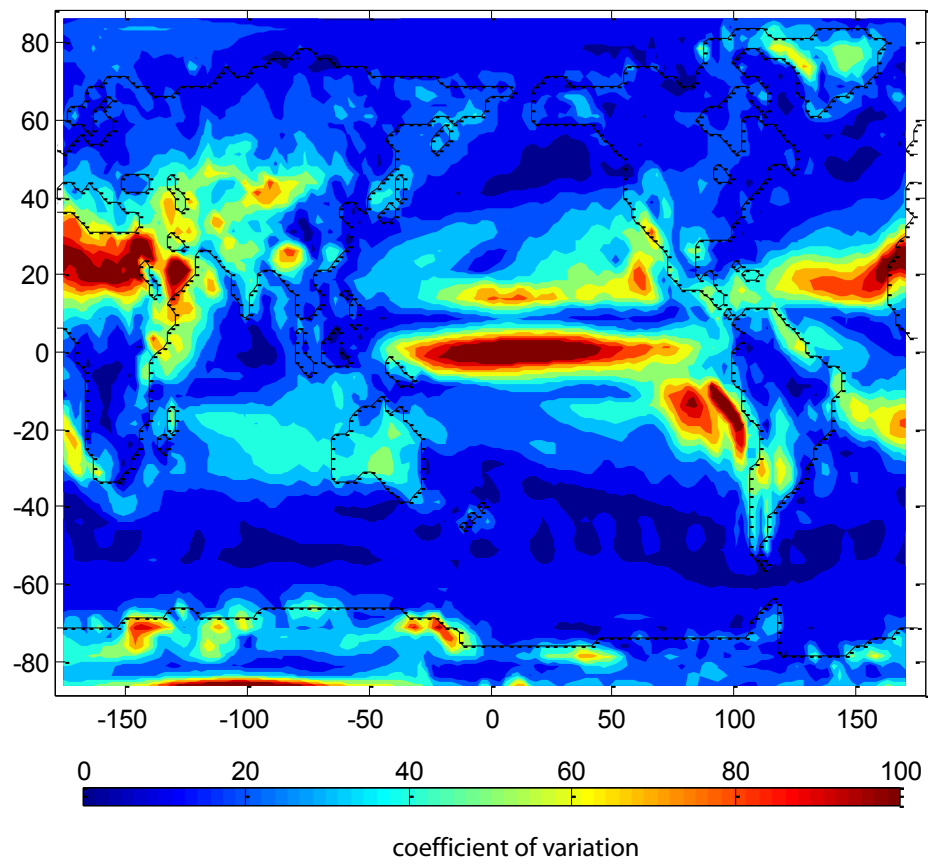

**Figure S2** Coefficient of variation for preindustrial model simulations, calculated as standard deviation of multi-model mean ( $n=5$ ) divided by multi-model mean. This is robust against larger standard deviations in regions of higher precipitation.

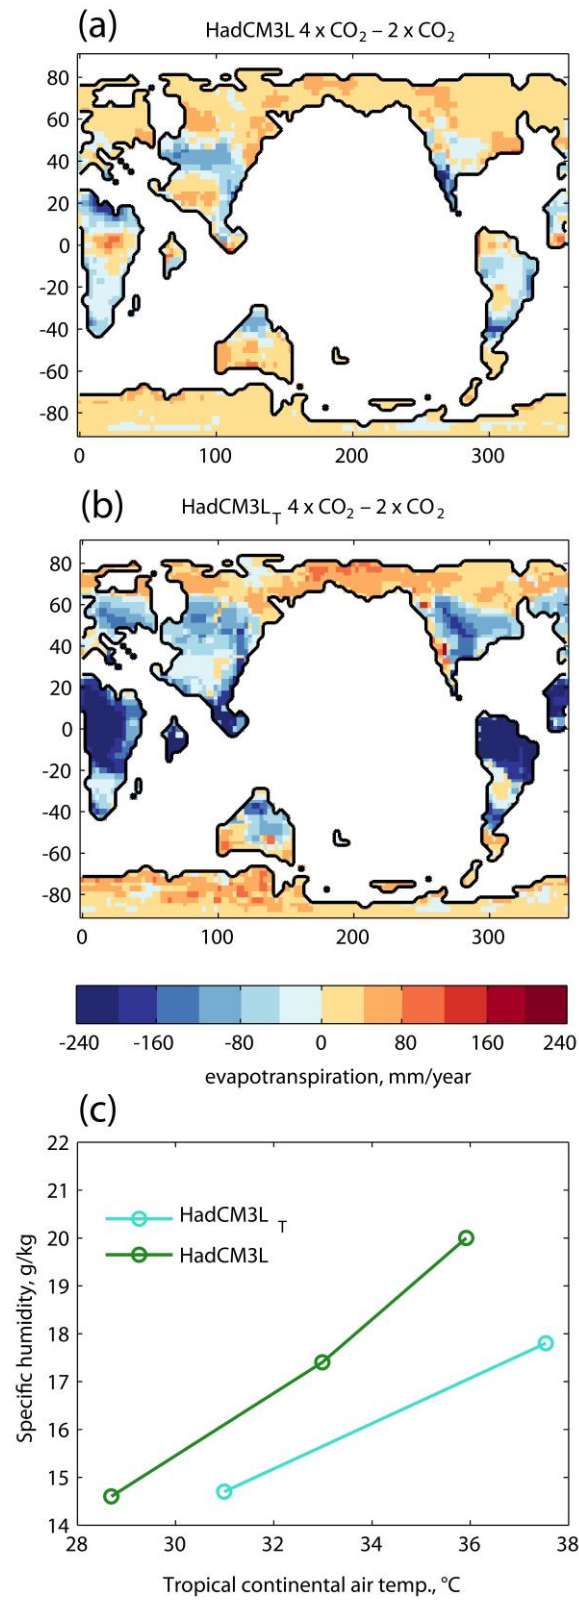

**Figure S3** Changes in mean annual evapotranspiration  $4 \times \text{CO}_2 - 2 \times \text{CO}_2$  in HadCM3L simulations in (a) the fixed shrubland simulations of Lunt et al. (2010) and (b) the TRIFFID dynamic vegetation simulations of Loptson et al. (2014). The differences in mean specific humidity relative to air temperature over tropical continents is shown in (c).

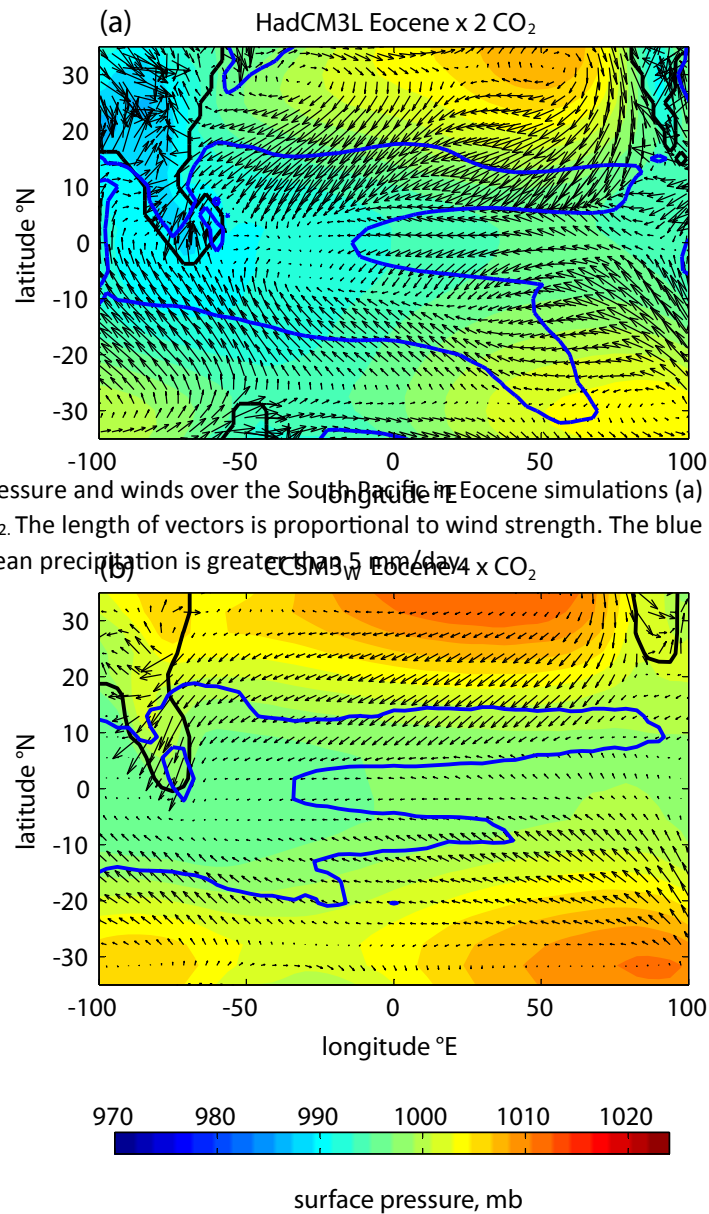

**Figure S4** Surface pressure and winds over the South Pacific in Eocene simulations (a) HadCM3L, 2 x CO<sub>2</sub> and (b) CCSM3W, 4 x CO<sub>2</sub>. The length of vectors is proportional to wind strength. The blue line shows the outline of the region where mean precipitation is greater than 5 mm/day.

**Figure S4** Surface pressure and winds over the South Pacific in Eocene simulations (a) HadCM3L, 2 x CO<sub>2</sub> and (b) CCSM3W, 4 x CO<sub>2</sub>. The length of vectors is proportional to wind strength. The blue line shows the outline of the region where mean precipitation is greater than 1800 mm/year (5 mm/day).

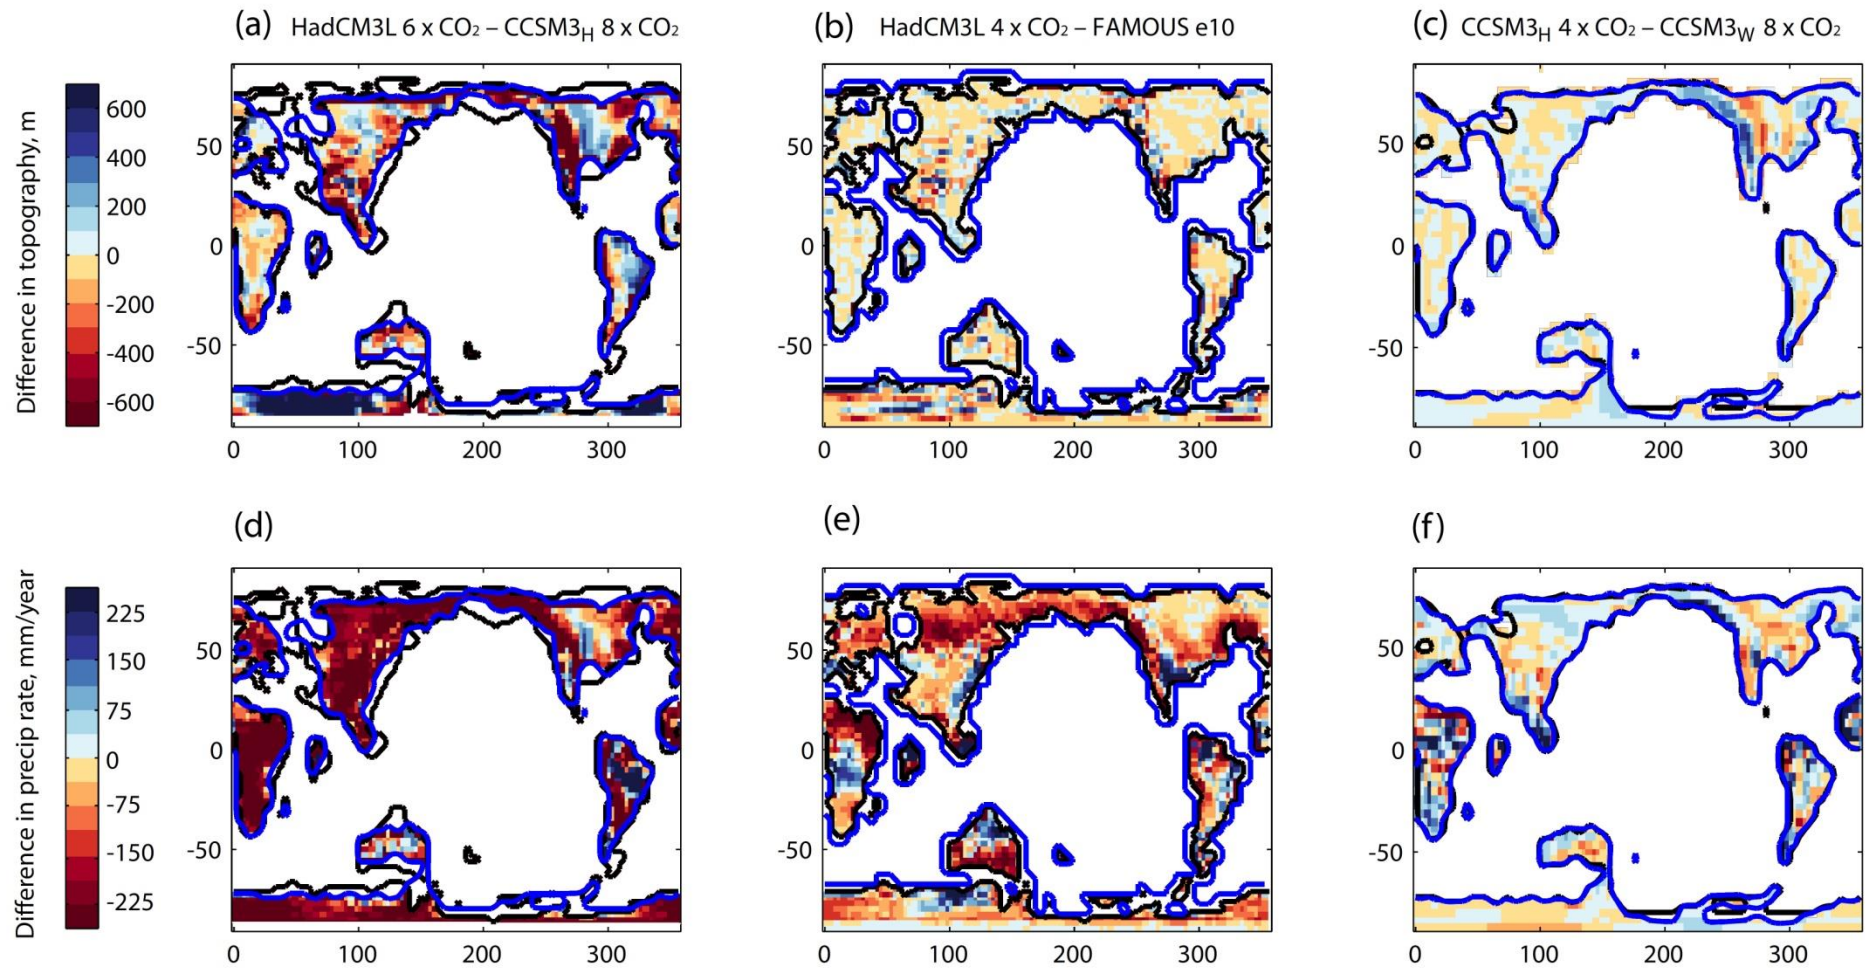

**Figure S5** Differences in topography (**a – c**) and precipitation rate (**d – f**) in pairs of simulations; HadCM3L 6 x CO<sub>2</sub> – CCSM3(H) 8 x CO<sub>2</sub> (**a,d**); HadCM3L 4 x CO<sub>2</sub> – FAMOUS e10 (**b,e**) and CCSM3(H) 4 x CO<sub>2</sub> and CCSM3(W) 8 x CO<sub>2</sub> (**c,f**). Simulations are chosen which have similar global precipitation rates (Figure 2).



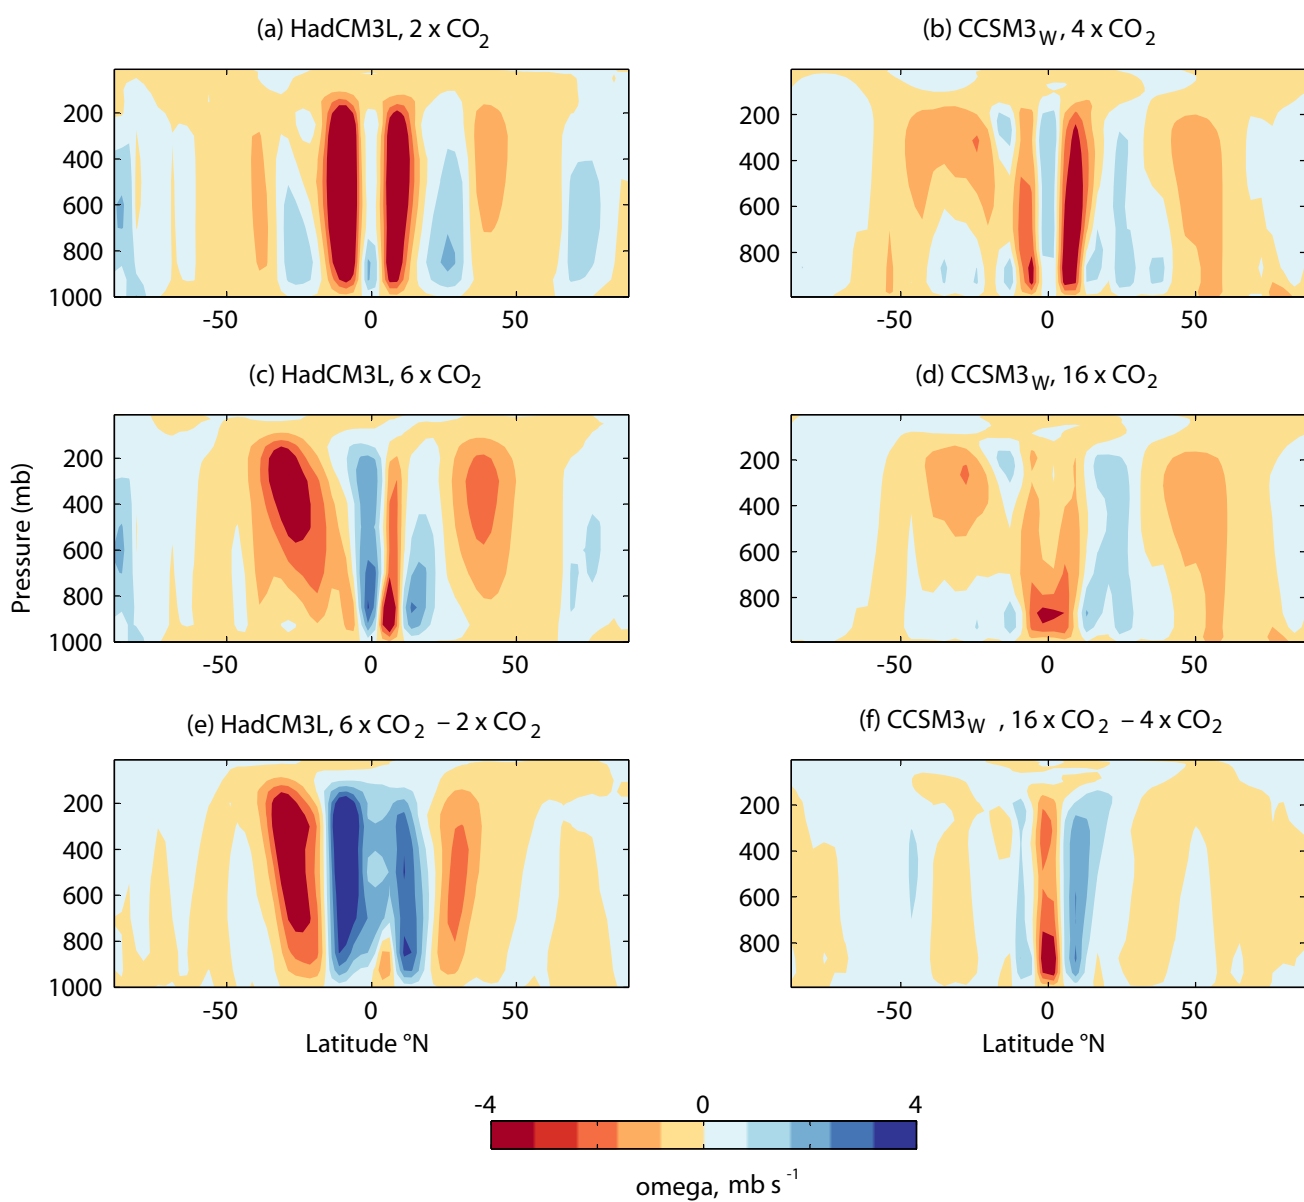

**Figure S6** Vertical velocity of atmosphere averaged over  $150^{\circ}\text{E}$  to  $150^{\circ}\text{W}$  for HadCM3L simulations (a, c) and CCSM3(W) simulations (b, d). Anomalies for the high  $\text{CO}_2$  – low  $\text{CO}_2$  simulations are shown in (e) and (f).

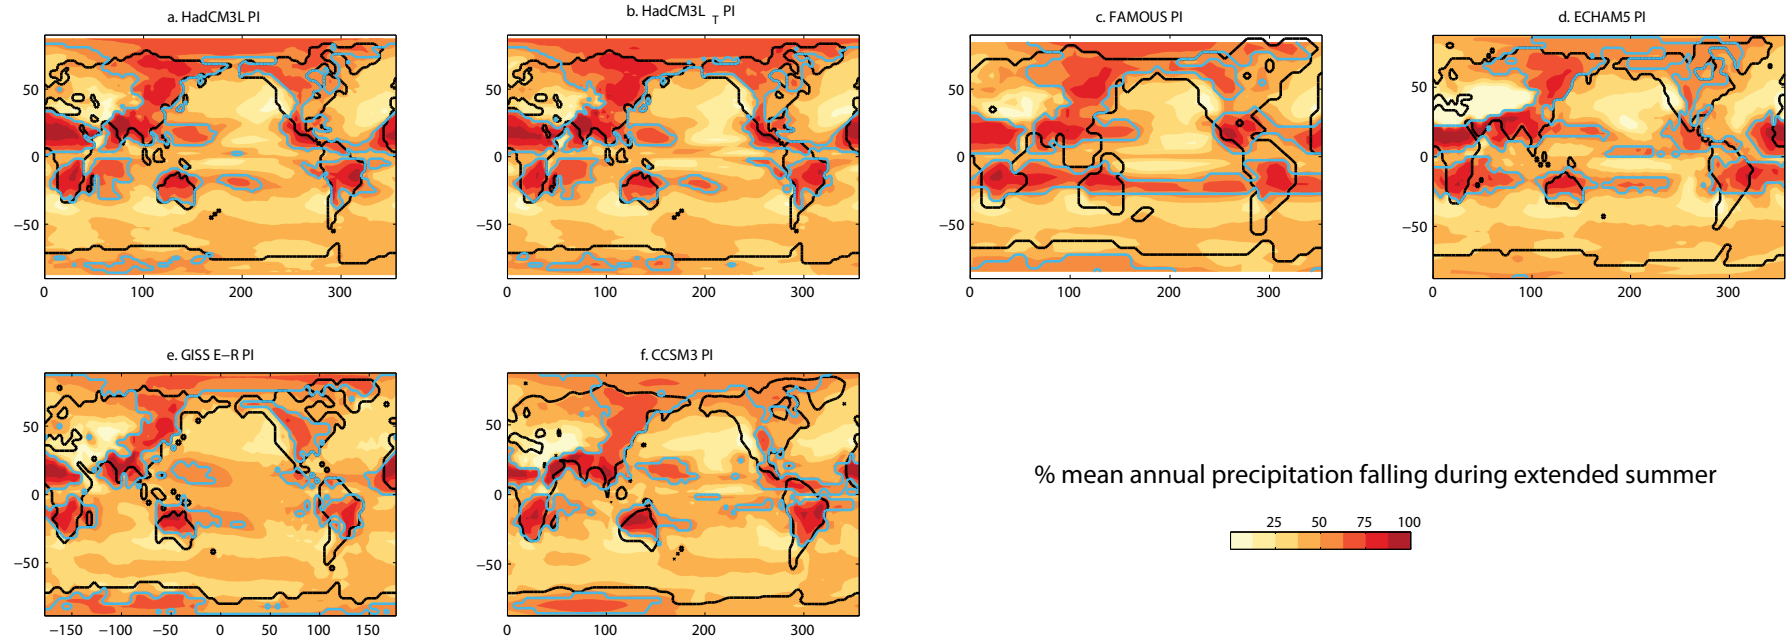

**Figure S7** Percentage of mean annual precipitation falling in the extended summer season (MJJAS for northern hemisphere, NDJFM for southern hemisphere) for preindustrial simulations; regions with >55% summer precipitation are outlined in blue.

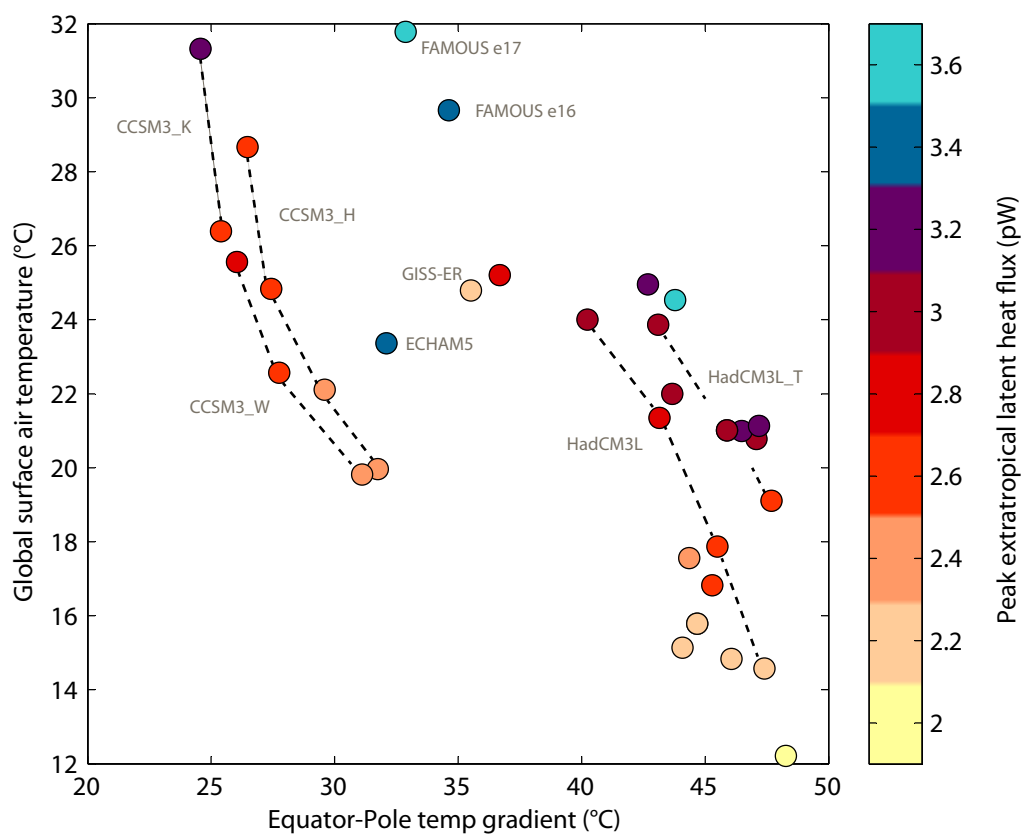

**Figure S8** Variations in the peak extratropical ( $>25^{\circ}\text{N/S}$ ) latent heat flux in petawatts ( $1 \text{ PW} = 10^{15} \text{ W}$ ) between the EoMIP model simulations relative to global mean surface air temperature and the average difference in surface air temperature between the poles and equator. With the exception of the FAMOUS simulations of Sagoo et al. (2013), simulations performed with the same GCM are joined by dotted lines for clarity.



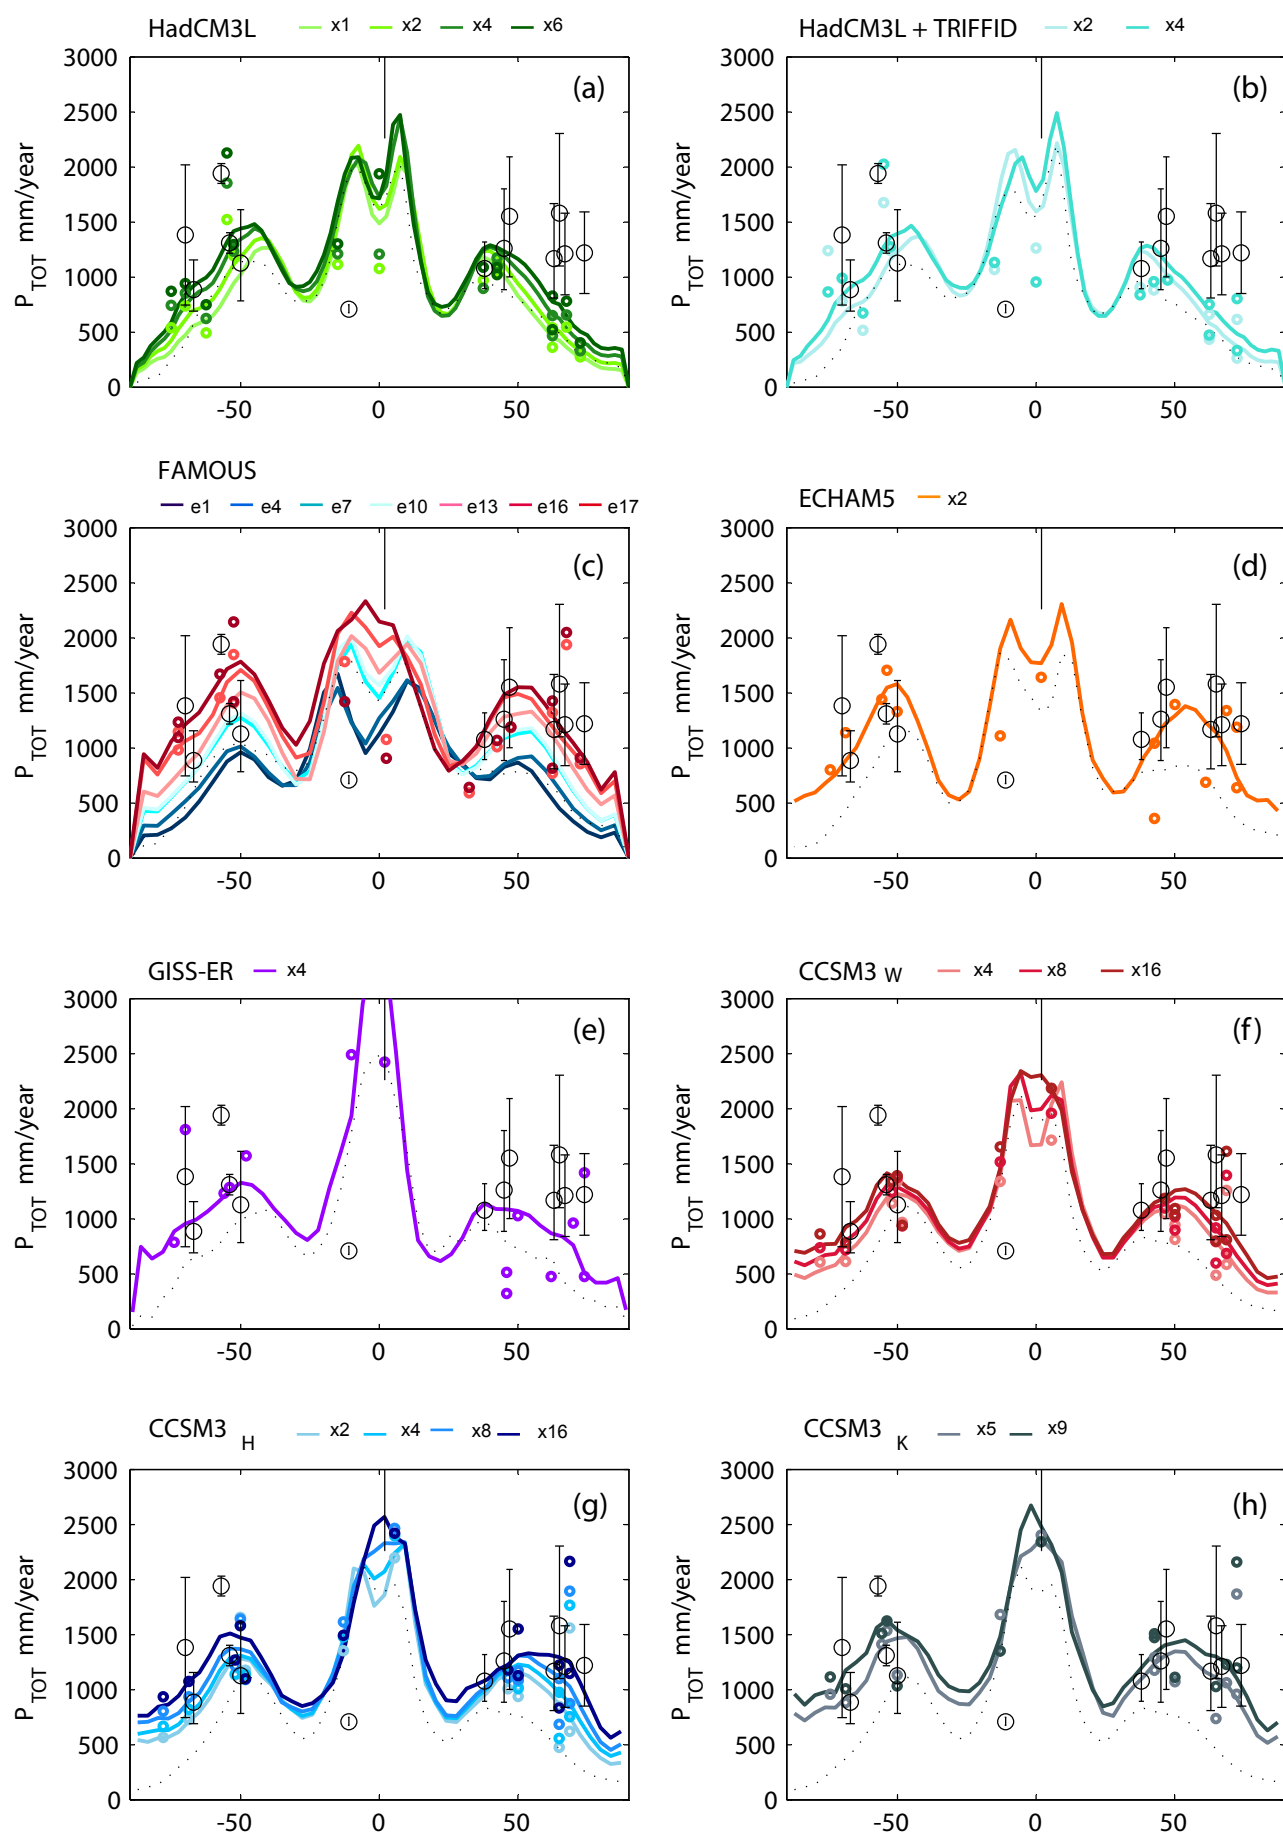

**Figure S9** Proxy estimates of mean annual precipitation shown relative to latitudinal precipitation distribution (mm/year) for each of the EoMIP simulations. Model CO<sub>2</sub> or simulation name in the case of FAMOUS are shown above each panel. Preindustrial precipitation is shown as a black dotted line. Geologic data are represented by a lower, central and upper estimate based on combined data for the following sites: Wilkes Land, Antarctic Peninsula, southern Australia, New Zealand, Chile, Tanzania, Colombia, eastern China, continental US, central Europe, North West Territories, Alaska, Site 913 and Axel Heiberg Island. Model estimates from gridboxes corresponding to the paleo-locations are shown as coloured circles.

| <b>Simulation</b>     | <b>Global mean precipitation<br/>(mm day<sup>-1</sup>)</b> | <b>Global mean evaporation<br/>(mm day<sup>-1</sup>)</b> | <b>Residual water mass<br/>( x 10<sup>12</sup> kg day<sup>-1</sup>)</b> | <b>Latent heat forcing<br/>( x 10<sup>13</sup> W)</b> |
|-----------------------|------------------------------------------------------------|----------------------------------------------------------|-------------------------------------------------------------------------|-------------------------------------------------------|
| <b>HadCM3L</b>        |                                                            |                                                          |                                                                         |                                                       |
| Preindustrial         | 2.915                                                      | 2.910                                                    | 2.565                                                                   | 6.710                                                 |
| Eocene x1             | 3.007                                                      | 3.005                                                    | 1.254                                                                   | 3.279                                                 |
| Eocene x2             | 3.202                                                      | 3.199                                                    | 1.380                                                                   | 3.610                                                 |
| Eocene x4             | 3.376                                                      | 3.372                                                    | 1.707                                                                   | 4.465                                                 |
| Eocene x6             | 3.510                                                      | 3.507                                                    | 1.878                                                                   | 4.916                                                 |
| Preindustrial TRIFFID | 2.866                                                      | 2.866                                                    | 0.2212                                                                  | 0.5786                                                |
| Eocene x2 TRIFFID     | 3.233                                                      | 3.233                                                    | 0.1615                                                                  | 0.4225                                                |
| Eocene x4 TRIFFID     | 3.415                                                      | 3.415                                                    | 0.1819                                                                  | 0.4758                                                |
| <b>ECHAM5</b>         |                                                            |                                                          |                                                                         |                                                       |
| Preindustrial         | 2.749                                                      | 2.759                                                    | -5.154                                                                  | -13.48                                                |
| Eocene x2             | 3.423                                                      | 3.433                                                    | -5.264                                                                  | -13.77                                                |
| <b>GISS-ER</b>        |                                                            |                                                          |                                                                         |                                                       |
| Preindustrial         | 2.968                                                      | 2.966                                                    | 0.5774                                                                  | 1.510                                                 |
| Eocene x4             | 3.675                                                      | 3.673                                                    | 1.077                                                                   | 2.816                                                 |
| <b>FAMOUS</b>         |                                                            |                                                          |                                                                         |                                                       |
| Preindustrial         | 2.908                                                      | 2.912                                                    | -2.361                                                                  | -6.176                                                |
| E16                   | 3.936                                                      | 9.939                                                    | -1.545                                                                  | -4.042                                                |
| E17                   | 4.135                                                      | 4.137                                                    | -1.245                                                                  | -3.255                                                |
| <b>CCSM3</b>          |                                                            |                                                          |                                                                         |                                                       |
| Preindustrial         | 2.650                                                      | 2.648                                                    | 1.164                                                                   | 3.044                                                 |
| Eocene H x2           | 3.288                                                      | 3.285                                                    | 1.082                                                                   | 2.830                                                 |
| Eocene H x4           | 3.415                                                      | 3.413                                                    | 1.121                                                                   | 2.932                                                 |
| Eocene Hx8            | 3.572                                                      | 3.570                                                    | 1.208                                                                   | 3.159                                                 |
| Eocene Hx16           | 3.790                                                      | 3.780                                                    | 5.062                                                                   | 13.24                                                 |
| Eocene Wx4            | 3.168                                                      | 3.166                                                    | 1.080                                                                   | 2.824                                                 |
| Eocene Wx8            | 3.332                                                      | 3.330                                                    | 1.166                                                                   | 3.049                                                 |
| Eocene Wx16           | 3.499                                                      | 3.496                                                    | 1.248                                                                   | 3.263                                                 |
| Eocene Kx5            | 3.678                                                      | 3.677                                                    | 1.321                                                                   | 3.455                                                 |
| Eocene Kx9            | 3.969                                                      | 3.966                                                    | 1.640                                                                   | 4.290                                                 |

**Table S1** Assessment of the imbalance between global precipitation and evaporation rates in the EoMIP ensemble. The imbalance is additionally shown as a global residual water mass and equivalent latent heat forcing.

|                                          | Preindustrial |                  |            |           |           |       | Eo x 1<br>CO2 | Eocene<br>x 2 CO2 |           |               |           |           |           | Eocene<br>x 4 CO2 |           |           |       |           |           | Eo x ~5<br>CO2 | Eo x 6<br>CO2 | Eocene x 8 CO2 |           | Eo x ~9<br>CO2 | Eocene x 16<br>CO2 |  |
|------------------------------------------|---------------|------------------|------------|-----------|-----------|-------|---------------|-------------------|-----------|---------------|-----------|-----------|-----------|-------------------|-----------|-----------|-------|-----------|-----------|----------------|---------------|----------------|-----------|----------------|--------------------|--|
|                                          | HadCM         | HadCM<br>TRIFFID | FAMOU<br>S | CCSM<br>* | ECHA<br>M | GISS  | HadC<br>M     | HadC<br>M         | HadC<br>M | FAMOU<br>SEI7 | ECHA<br>M | CCSM<br>H | HadC<br>M | HadC<br>M         | CCSM<br>H | CCSM<br>W | GISS  | CCSM<br>K | HadC<br>M | CCSM<br>H      | CCSM<br>W     | CCSM<br>K      | CCSM<br>H | CCSM<br>W      |                    |  |
| Global P <sub>TOT</sub>                  | 2.91          | 2.87             | 2.91       | 2.65      | 2.75      | 2.97  | 3.01          | 3.20              | 3.23      | 4.13          | 3.42      | 3.29      | 3.38      | 3.42              | 3.42      | 3.17      | 3.67  | 3.68      | 3.51      | 3.57           | 3.33          | 3.97           | 3.79      | 3.50           |                    |  |
| Global P <sub>CV</sub>                   |               | 2.16             | 2.37       | 1.99      | 1.80      |       | 2.38          | 2.56              | 2.60      | 3.75          | 2.37      | 2.65      | 2.73      | 2.80              | 2.78      | 2.57      |       | 3.12      | 2.89      | 2.96           | 2.76          | 3.39           | 3.19      | 2.93           |                    |  |
| Global P <sub>LS</sub>                   |               | 0.71             | 0.54       | 0.66      | 0.95      |       | 0.63          | 0.64              | 0.63      | 0.39          | 1.05      | 0.63      | 0.64      | 0.62              | 0.63      | 0.60      |       | 0.56      | 0.62      | 0.61           | 0.58          | 0.58           | 0.60      | 0.57           |                    |  |
| Global P <sub>CV</sub> /P <sub>TOT</sub> |               | 0.75             | 0.81       | 0.75      | 0.65      |       | 0.79          | 0.80              | 0.80      | 0.91          | 0.69      | 0.81      | 0.81      | 0.82              | 0.81      | 0.81      |       | 0.85      | 0.82      | 0.83           | 0.83          | 0.85           | 0.84      | 0.84           |                    |  |
| Global Temp /°C                          | 12.72         | 11.87            | 14.36      | 11.62     | 13.54     | 13.79 | 14.57         | 17.87             | 19.11     | 31.77         | 23.36     | 19.96     | 21.35     | 23.86             | 22.10     | 19.82     | 24.79 | 26.39     | 24.00     | 24.83          | 22.56         | 31.32          | 28.67     | 25.56          |                    |  |
| Land P <sub>TOT</sub>                    | 2.14          | 2.20             | 2.62       | 1.90      | 1.81      | 2.45  | 2.08          | 2.25              | 2.29      | 3.22          | 2.57      | 3.11      | 2.40      | 2.36              | 3.36      | 2.90      | 3.12  | 3.66      | 2.65      | 3.61           | 3.18          | 3.93           | 3.86      | 3.43           |                    |  |
| Land P <sub>CV</sub>                     |               | 1.66             | 2.17       | 1.40      | 1.05      |       | 1.59          | 1.71              | 1.77      | 2.63          | 1.37      | 2.37      | 1.84      | 1.80              | 2.61      | 2.26      |       | 2.98      | 2.07      | 2.85           | 2.52          | 3.23           | 3.10      | 2.76           |                    |  |
| Land P <sub>LS</sub>                     |               | 0.54             | 0.44       | 0.50      | 0.76      |       | 0.49          | 0.54              | 0.52      | 0.60          | 1.21      | 0.74      | 0.56      | 0.55              | 0.75      | 0.64      |       | 0.69      | 0.58      | 0.76           | 0.66          | 0.70           | 0.76      | 0.67           |                    |  |
| Land P <sub>CV</sub> /P <sub>TOT</sub>   |               | 0.75             | 0.83       | 0.74      | 0.58      |       | 0.76          | 0.76              | 0.77      | 0.82          | 0.53      | 0.76      | 0.77      | 0.76              | 0.78      | 0.78      |       | 0.81      | 0.78      | 0.79           | 0.79          | 0.82           | 0.80      | 0.80           |                    |  |
| Land Temp /°C                            | 6.26          | 5.65             | 10.64      | 6.18      | 7.70      | 8.19  | 8.05          | 12.07             | 14.64     | 30.01         | 20.90     | 16.24     | 16.54     | 21.03             | 18.93     | 16.71     | 21.98 | 24.65     | 20.14     | 22.17          | 19.99         | 30.68          | 26.85     | 23.59          |                    |  |
| Ocean P <sub>TOT</sub>                   | 3.23          | 3.14             | 3.12       | 2.96      | 3.12      | 3.18  | 3.38          | 3.59              | 3.62      | 4.80          | 3.74      | 3.35      | 3.77      | 3.85              | 3.43      | 3.26      | 3.87  | 3.68      | 3.86      | 3.56           | 3.38          | 3.98           | 3.77      | 3.52           |                    |  |
| Ocean P <sub>CV</sub>                    |               | 2.36             | 2.52       | 2.23      | 2.10      |       | 2.70          | 2.90              | 2.94      | 4.58          | 2.75      | 2.75      | 3.09      | 3.21              | 2.85      | 2.68      |       | 3.17      | 3.23      | 2.99           | 2.83          | 3.44           | 3.22      | 2.99           |                    |  |
| Ocean P <sub>LS</sub>                    |               | 0.76             | 0.61       | 0.73      | 1.02      |       | 0.68          | 0.69              | 0.68      | 0.23          | 0.99      | 0.60      | 0.68      | 0.64              | 0.59      | 0.58      |       | 0.52      | 0.63      | 0.57           | 0.55          | 0.54           | 0.55      | 0.53           |                    |  |
| Ocean P <sub>CV</sub> /P <sub>TOT</sub>  |               | 0.75             | 0.81       | 0.75      | 0.67      |       | 0.80          | 0.81              | 0.81      | 0.95          | 0.74      | 0.82      | 0.82      | 0.83              | 0.83      | 0.82      |       | 0.86      | 0.84      | 0.84           | 0.84          | 0.86           | 0.85      | 0.85           |                    |  |
| Land/Ocean P <sub>TOT</sub>              | 0.66          | 0.70             | 0.84       | 0.64      | 0.58      | 0.77  | 0.62          | 0.63              | 0.63      | 0.67          | 0.69      | 0.93      | 0.64      | 0.61              | 0.98      | 0.89      | 0.81  | 0.99      | 0.69      | 1.01           | 0.94          | 0.99           | 1.02      | 0.97           |                    |  |
| Ocean Temp /°C                           | 15.35         | 14.41            | 17.14      | 13.88     | 15.88     | 16.12 | 17.23         | 20.23             | 20.92     | 33.08         | 24.29     | 21.21     | 23.30     | 25.02             | 23.17     | 20.86     | 25.91 | 26.96     | 25.58     | 25.72          | 23.43         | 30.68          | 26.85     | 23.59          |                    |  |

**Table S2** Sensitivity of the global Eocene hydrological cycle. Rates shown represent annual mean precipitation mm day<sup>-1</sup> globally and separately over land and ocean. TOT = total precipitation rate; CV = convective precipitation; LS = large-scale precipitation. Note that CV and LS sum to give total precipitation rate, but land and ocean represent averages over those regions; \* CCSM\_W, CCSM\_H and CCSM\_K share a preindustrial simulation.
