# Supplementary material for: A model–model and data–model comparison for the early Eocene hydrological cycle
Source: Copernicus journal article supplement (doi:10.5194/cp-12-455-2016), 2016-02-25
Supplement: Supplementary file 1 [file References accompanying Table S3.docx]

**References accompanying Table S3**

Akkiraz, M. S., Kayseri, M. S., and Akgun, F.: Palaeoecology of coal-bearing Eocene sediments in Central Anatolia (Turkey) based on quantitative palynological data, Turk. J. Earth Sci., 17, 317–360, 2008.

Contreras, L., Pross, J., Bijl, P. K., Koutsodendris, A., Raine, J. I., van de Schootbrugge, B., and Brinkhuis, H.: Early to Middle Eocene vegetation dynamics at the Wilkes Land Margin (Antarctica), Rev. Palaeobot. Palyno., 197, 119–142, doi:10.1016/j.revpalbo.2013.05.009, 2013.

Eldrett, J. S., Greenwood, D. R., Harding, I. C., and Huber, M.: Increased seasonality through the Eocene to Oligocene transition in northern high latitudes, Nature, 459, 969–973, doi:10.1038/nature08069, 2009.

Eldrett, J. S., Greenwood, D. R., Polling, M., Brinkhuis, H., and Sluijs, A.: A seasonality trigger for carbon injection at the Paleocene-Eocene Thermal Maximum, Clim. Past, 10, 759–769, doi:10.5194/cp-10-759-2014, 2014.

Hinojosa, L. F. and Villagrán, C.: Did South American Mixed Paleofloras evolve under thermal equability or in the absence of an effective Andean barrier during the Cenozoic?, Palaeogeogr. Palaeocl., 217, 1–23, doi:10.1016/j.palaeo.2004.11.013, 2005.

Hinojosa, L. F., Pesce, O., Yabe, A., Uemura, K., and Nishida, H.: physiognomical analysis and paleoclimate of the Ligorio Márquez fossil flora, Ligorio Márquez formation, 46_450 S, Chile, in: Post-Cretaceous Floristic Changes in Southern Patagonia, Chile, edited by: Nishida, H., ChuoUniv., Tokyo, 45–55, 2006

Gayó, E., Hinojosa, L. F., and Villagrán, C.: On the persistence of Tropical Paleofloras in central Chile during the Early Eocene, Rev. Palaeobot. Palyno., 137, 41–50, doi:10.1016/j.revpalbo.2005.09.001, 2005.

Golovneva, L. B.: Early Palaeogene floras of Spitsbergen and North Atlantic floristic exchange, Acta Universitatis Carolinae – Geologica, 44, 39–50, 2000.

Greenwood, D. R., Moss, P. T., Rowett, A. I., Vadala, A. J., and Keefe, R. L.: Plant communities and climate change in southeastern Australia during the early Paleogene, in: Causes and Consequences of Globally Warm Climates in the Early Paleogene, The Geological Society of America, Inc., Boulder, CO, doi:10.1130/0-8137-2369-8.365, 365–380, 2003.

Greenwood, D. R., Archibald, S. B., Mathewes, R. W., and Moss, P. T.: Fossil biotas from the Okanagan Highlands, southern British Columbia and northeastern Washington State: climates and ecosystems across an Eocene landscape, Can. J. Earth Sci., 42, 167–185, doi:10.1139/e04-100, 2005.

Greenwood, D. R., Basinger, J. F., and Smith, R. Y.: How wet was the Arctic Eocene rain forest? Estimates of precipitation from Paleogene Arctic macrofloras, Geology, 38, 15–18, doi:10.1130/G30218.1, 2010.

Grein, M., Utescher, T., Wilde, V., and Roth-Nebelsick, A.: Reconstruction of the middle Eocene climate of Messel using palaeobotanical data, Neues Jahrb. Geol. P.-A., 260, 305–318, 2011.

Hunt, R. J. and Poole, I.: PaleogeneWest Antarctic climate and vegetation history in light of new data from King George Island, Geol. S. Am. S., 369, 395–412, doi:10.1130/0-8137-2369-8.395, 2003.

Jacobs, B. F. and Herendeen, P. S.: Eocene dry climate and woodland vegetation in tropical Africa reconstructed from fossil leaves from northern Tanzania, Palaeogeogr. Palaeocl., 213, 115–123, doi:10.1016/j.palaeo.2004.07.007, 2004.

Kaiser, T. M., Ansorge, J., Arratia, G., Bullwinkel, V., Gunnell, G. F., Herendeen, P. S., Jacobs, B., Mingram, J., Msuya, C., Musolff, A., Naumann, R., Schulz, E., and Wilke, V.: The maar lake of Mahenge (Tanzania) – unique evidence of Eocene terrestrial environments in sub-Sahara Africa, Z. Dtsch. Ges. Geowiss., 157, 411–413, 2006.

Mosbrugger, V., Utescher, T., and Dilcher, D. L.: Cenozoic continental climatic evolution of Central Europe, P. Natl. Acad. Sci. USA, 102, 14964–14969, doi:10.1073/pnas.0505267102, 2005.

Pancost, R. D., Taylor, K. W. R., Inglis, G. N., Kennedy, E. M., Handley, L., Hollis, C. J., Crouch, E. M., Pross, J., Huber, M., Schouten, S., Pearson, P. N., Morgans, H. E. G., and Raine, J. I.: Early Paleogene evolution of terrestrial climate in the SW Pacific, Southern New Zealand, Geochem. Geophy. Geosy., 14, 5413–5429, doi:10.1002/2013gc004935, 2013.

Poole, I., Cantrill, D., and Utescher, T.: A multi-proxy approach to determine Antarctic terrestrial palaeoclimate during the Late Cretaceous and Early Tertiary, Palaeogeogr. Palaeocl., 222, 95– 121, doi:10.1016/j.palaeo.2005.03.011, 2005.

Pross, J., Contreras, L., Bijl, P. K., Greenwood, D. R., Bohaty, S. M., Schouten, S., Bendle, J. A., Rohl, U., Tauxe, L., Raine, J. I., Huck, C. E., van de Flierdt, T., Jamieson, S. S. R., Stickley, C. E., van de Schootbrugge, B., Escutia, C., Brinkhuis, H., and IODP Expedition 318 Scientists: Persistent near-tropical warmth on the Antarctic continent during the early Eocene epoch, Nature, 488, 73–77, doi:10.1038/Nature11300, 2012.

Quan, C., Liu, Y.S.C. and Utescher. T.: Paleogene evolution of precipitation in northeastern China supporting the middle Eocene intensification of the East Asian monsoon, Palaios, 26, 743 – 753, doi: 10.2110/pal.2011.p11-019r, 2011

Quan, C., Liu, Y. S. C., and Utescher, T.: Eocene monsoon prevalence over China: a paleobotanical perspective, Palaeogeogr. Palaeocl., 365–366, 302–311, doi:10.1016/j.palaeo.2012.09.035, 2012.

Smith, R. Y., Basinger, J. F., and Greenwood, D. R.: Early Eocene plant diversity and dynamics in the Falkland flora, Okanagan Highlands, British Columbia, Canada, Palaeobiodiversity and Palaeoenvironments, 92, 309–328, doi:10.1007/s12549-011-0061-5, 2012.

Sunderlin, D., Loope, G., Parker, N. E., and Williams, C. J.: Paleoclimatic and paleoecological implications of a Paleocene– Eocene fossil leaf assemblage, Chickaloon Formation, Alaska, Palaios, 26, 335–345, doi:10.2110/palo.2010.p10-077r, 2011.

Sunderlin, D., Trop, J. M., Idleman, B. D., Brannick, A., White, J. G., and Grande, L.: Paleoenvironment and paleoecology of a Late Paleocene high-latitude terrestrial succession, Arkose Ridge Formation at Box Canyon, southern Talkeetna Mountains, Alaska, Palaeogeogr. Palaeocl., 401, 57–80, doi:10.1016/j.palaeo.2014.02.012, 2014.

Uhl, D., Traiser, C., Griesser, U., and Denk, T.: Fossil leaves as palaeoclimate proxies in the Palaeogene of Spitsbergen (Svalbard), Acta Palaeobotanica, 47, 89–107, 2007.

Wang, Q., Spicer, R.A., Yang, J., Wang Y-F., Li, C-S.: The Eocene climate of China, the early elevation of the Tibetan Plateau and the onset of the Asian Monsoon, Global Change Biology, 19, 3709 – 3728, doi: 10.1111/gcb.12336, 2013

Wang, Q., Ferguson, D.K., Feng, G.P., Ablaev, A.G., Wang, Y.F., Yang, J., Li, Y.L., Li, C.S.: Climatic change during the Palaeocene to Eocene based on fossil plants from Fushun, China, Palaeogeogr. Palaeocl., 295, 323 – 331, doi: 10.1016/j.palaeo.2010.06.010, 2010

Wilf, P., Wing, S. L., Greenwood, D. R., and Greenwood, C. L.: Using fossil leaves as paleoprecipitation indicators: an Eocene example, Geology, 26, 203–206, doi:10.1130/0091-7613(1998)026< 0203:UFLAPI> , 2.3.Co;2, 1998.

Wilf, P.: Late Paleocene–Early Eocene climate changes in southwestern Wyoming: paleobotanical analysis, Geol. Soc. Am. Bull., 112, 292–307, doi:10.1130/0016-7606(2000)112<0292:Lpeecc> ,2.3.Co;2, 2000.

Wilf, P., Johnson, K. R., Cuneo, N. R., Smith, M. E., Singer, B. S., and Gandolfo, M. A.: Eocene plant diversity at Laguna del Hunco and Rio Pichileufu, Patagonia, Argentina, Am. Nat., 165, 634–650, doi:10.1086/430055, 2005.

Wing, S. L. and Greenwood, D. R.: Fossils and fossil climate –the case for equable continental interiors in the Eocene, Philos. T. Roy. Soc. B, 341, 243–252, doi:10.1098/rstb.1993.0109, 1993.

Wing, S. L., Harrington, G. J., Smith, F. A., Bloch, J. I., Boyer, D. M., and Freeman, K. H.: Transient floral change and rapid global warming at the Paleocene–Eocene boundary, Science, 310, 993– 996, doi:10.1126/science.1116913, 2005.

Wing, S. L., Herrera, F., Jaramillo, C. A., Gómez-Navarro, C.,Wilf, P., and Labandeira, C. C.: Late Paleocene fossils from the Cerrejon Formation, Colombia, are the earliest record of Neotropical rainforest, P. Natl. Acad. Sci. USA, 106, 18627–18632, doi:10.1073/pnas.0905130106, 2009

Wolfe, J. A.: A method of obtaining climatic parameters from leaf assemblages, US Geological Survey Bulletin, United States Government Printing Office, Washington, 2040, 1–71, 1993.

Yao, Y.F., Bera, S., Ferguson, D.K., Mosbrugger, V., Paudayal, K.N., Jin, J.H., Li, C.S.: Reconstruction of paleovegetation and paleoclimate in the Early and Middle Eocene, Hainan Island, China, Climatic Change, 92, 169 – 189, doi:10.1007/s10584-008-9457-2, 2009
