# Supplementary material for: A model–model and data–model comparison for the early Eocene hydrological cycle
Source: Copernicus journal article supplement (doi:10.5194/cp-12-455-2016), 2016-02-25
Supplement: Supplementary file 2 [file cp-12-455-2016-supplement.zip]

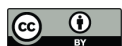

## *Supplement of*

# **A model–model and data–model comparison for the early Eocene hydrological cycle**

**Matthew J. Carmichael et al.**

*Correspondence to:* Matthew J. Carmichael ([matt.carmichael@bristol.ac.uk](mailto:matt.carmichael@bristol.ac.uk))

- [cp-12-455-2016-supplement-title-page.pdf](#)
- revised supplement with references
  - References accompanying Table S3.docx
  - Supplement.pdf
  - Table S3.xlsx

The copyright of individual parts of the supplement might differ from the CC-BY 3.0 licence.
