# Supplementary material for: A model–model and data–model comparison for the early Eocene hydrological cycle
Source: Copernicus journal article supplement (doi:10.5194/cp-12-455-2016), 2016-02-25
Supplement: Supplementary file 3 [file Table S3.xlsx]

## Sheet: DATA
	Site	Age (numerical estimates are Ma)	Paleocoordinates		Reference*	Methodology	Mean annual precip and error (cm)			Notes
			Latitude	Longitude			low	mean	high
	North America
	Bears Paw, Montana	49 - 51	46.6	-86.4	Wilf et al. 1998	LAA	91	130	186	Fluvial environment. Paleoaltitude 500 – 1000 m. Errors are mean +/- standard error.		Abbreviations: LAA – Leaf Area Index (Wilf et al., 1998); CLAMP – Climate Leaf Analysis Multivariate Program (Wing and Greenwood, 1993; Greenwood and Wing, 1995); NLR – Nearest Living Relative which includes BA - Bioclimatic Analysis (Greenwood et al., 1995) and CA – Coexistence Analysis (Mosbrugger and Utescher, 1997) and MCR – Mutual Climate Range (Thompson et al., 2012) methodologies; WP – Woo…
					(Wing and Greenwood 1993)	(CLAMP)	237	277	327
	Yellowstone Sepulcher, Wyoming	50 - 51	43.6	-88.5	Wilf et al. 1998	LAA	95	136	195	Fluvial environment. Paleoaltitude ~ 1000 m. Errors are mean +/- standard error.
					(Wing and Greenwood 1993)	(CLAMP)	145	195	245
	Camels Butte, North Dakota	53 – 55	44.6	-80.4	Wilf et al. 1998	LAA	110	157	225	Fluvial environment. Paleoaltitute < 200 m. Errors are mean +/- standard error.
					(Wing and Greenwood 1993)	(CLAMP)	112	162	212
	Chalk Bluffs, California	50 – 52	39.3	-99.7	Wilf et al. 1998	LAA	112	160	229	Fluvial environment. Paleoaltitude < 200 m. Errors are mean +/- standard error.
					(Wing and Greenwood 1993)	(CLAMP)	191	241	-291
	Green River, Wyoming	45 – 48	40.4	-87.7	Wilf et al. 1998	LAA	59	84	120	Lacustrine environment. Paleoaltitude 500 – 1000 m. Errors are mean +/- standard error.
					(Wing and Greenwood 1993)	(CLAMP)	66	116	166			MAP estimates are shown to the nearest centimetre per year, along with an upper and lower estimate. For the LAA data, these are typically mean +/- standard error whilst NLR data are typically the 25th and 75th percentile estimates. Where possible, further information is given for each sample in the notes column.
	Kisinger Lakes, Wyoming	49 – 50	42.2	-87.9	Wilf et al. 1998	LAA	77	110	157	Fluvial environment. Paleoaltitude 500 – 1000 m. Errors are mean +/- standard error.
					(Wing and Greenwood 1993)	(CLAMP)	79	129	179
	Wind River Basin, Wyoming	49 – 50	42.2	-87.3	Wilf et al. 1998	LAA	77	104	149	Fluvial environment. Paleoaltitude 500 – 1000 m. Errors are mean +/- standard error.
					(Wing and Greenwood 1993)	(CLAMP)	99	149	199
	Falkland, British Colombia	52 - 49	50.1	-95.4	Smith et al. 2012	LAA	73	114	163	Okanagan Highlands – cool upland lacustrine environment. Errors are mean +/- standard error.
	Republic, Okanagan Highlands	Ypresian, 49.4	48.6	-95.4	Greenwood et al., 2005	NLR-CA	76	115	154	Upland environment with cooler temperatures than coastal lowland sites. Paleoaltitude generally greater than 1000 m. Error bars represent the upper and lower bounds of the range in climate profiles for all taxa.
	One Mile-Princeton, Okanagan Highlands	Ypresian?	49.1	-96.2	Greenwood et al., 2005	NLR-CA	72	114	156
	Quilchena, Okanagan Highlands	Ypresian, 51.5	50	-96.5	Greenwood et al., 2005	NLR-CA	98	126	154
	Falkland, Okanagan Highlands	Ypresian, 50.6	50.1	-95.4	Greenwood et al., 2005	NLR-CA	57	105	153			* Full citations are provided in accompanying MS Word document.
	McAbee, Okanagan Highlands	Ypresian, ~51	50.6	-97.4	Greenwood et al., 2005	NLR-CA	73	108	143
	Horsefly, Okanagan Highlands	Ypresian?	52.1	-96.6	Greenwood et al., 2005	NLR-CA	58	105	152
	Driftwood Canyon, Okanagan Highlands	Ypresian, 51.8	55.3	-101.2	Greenwood et al., 2005	NLR-CA	39	102	165
	Clarkforkian, Green River, Wyoming	Late Paleocene	40	-87.1	Wilf et al., 2000	LAA	96	137	196	Errors are mean +/- standard error.
	Big Multi, Green River, Wyoming	Late Paleocene	40	-87.1	Wilf et al., 2000	LAA	90	129	185
	Latham, Green River, Wyoming	Early Eocene	40	-86.3	Wilf et al., 2000	LAA	79	113	162
	Sourdough, Green River, Wyoming	Early Eocene	40.2	-86.4	Wilf et al., 2000	LAA	98	140	201
	Niland Tongue, Green River, Wyoming	Early Eocene	40.2	-86.4	Wilf et al., 2000	LAA	70	100	143
	Little Mountain, Green River, Wyoming	Early Eocene	39.6	-87.9	Wilf et al., 2000	LAA	54	77	110
	Cabin Fork, Bighorn Basin	PETM	42.3	-85.7	Wing et al. 2005	LAA	37	123 (120)	300	Channel fills of inter-montane basin. Estimates based on Wilf et al. (1998) and Jacob and Herendereen (2004) calibrations, respectively. Errors are mean +/- standard error.
	Cabin Fork, Bighorn Basin	lower PETM	42.3	-85.7	Wing et al. 2005	LAA	24	80 (41)	194
	Cabin Fork, Bighorn Basin	upper PETM	42.3	-85.7	Wing et al. 2005	LAA	44	144 (132)	350
	Arctic
	Chickaloon Fm, Alaska, Bed C	Paleocene-Eocene	64.8	-120.3	Sunderlin et al. 2011	LAA	111	159	228	Fluvial-lacustrine floodplain deposits. Errors are mean +/- standard error.
	Chickaloon Fm, Alaska, Bed B	Paleocene-Eocene	64.8	-120.3	Sunderlin et al. 2011	LAA	112	160	230
	Chickaloon Fm, Alaska, Bed A – E	Paleocene-Eocene	64.8	-120.3	Sunderlin et al. 2011	LAA	108	155	221
	Arkrose Ridge Fm, Alaska	59 – 48	64.9	-120.4	Sunderlin et al. 2014	LAA	84	121	173	Same basin as Chickaloon Fm; Chickaloon a more distal depositional environment.
	Slave Province, Canada	53.3 +/- 0.6	62.6	-80.3	Wolfe et al. 2012	NLR		>100		Fossilised Metasequoia wood within kimberlite pipe – extant precip requirement.
	Site 913, Norwegian Greenland Sea	48 – 49	66.9	8.1	Eldrett et al. 2009	NLR-BA	84	121	158	Average from across 8 samples where > 12 NLR. Pollen indicates coniferous Greenland with possible transport from both lowlands and uplands.
	US 188, Axel Heiberg Island	Late Lutetian	74.2	-45.1	Greenwood et al. 2010	NLR-BA	85	122	159	Swamp forest and floodplain forests, overbank and lacustrine deposits. Error bars represent the upper and lower bounds of the range in climate profiles for all taxa.
	US 188, Axel Heiberg Island	Late Lutetian	74.2	-45.1	Greenwood et al. 2010	LAA	93	133	190	Errors are mean +/- standard error. Overbank and lacustrine deposits.
	Hot Weather Creek, Ellesmere Island	Paleocene	75.7	-34.6	Greenwood et al. 2010	LAA	100	143	205
	US 111, Ellesmere Island	Paleocene	75.7	-34.6	Greenwood et al. 2010	LAA	107	153	219
	Seagull Island, NWT	Paleocene	64.6	-94.1	Greenwood et al. 2010	LAA	73	105	150
	MacKenzie River, NWT	Paleocene	64.6	-94.1	Greenwood et al. 2010	LAA	89	128	183
	Aspelintoppen Fm, Spitsbergen	Early Eocene age suggested in Golovneva; Uhl et al. suggest mid-late Eocene - early Oligocene.	73.9	-4.9	Golovneva, 2000	CLAMP		172		Error bars not stated.
	Aspelintoppen Fm, Spitsbergen		73.9	-4.9	Uhl et al. 2007	NLR-CA	58		152	Lower and upper estimates is the range of climatic tolerances.
	South America
	Laguna del Hunco, Patagonia - LH13	EECO	-50.4	-48.6	Wilf et al. 2005	LAA	76	109	156	Lacustrine, low altitude maritime climate. Lakeshore flora. Errors mean +/- standard error.
	Laguna del Hunco, Patagonia – LH2	EECO	-50.4	-48.6	Wilf et al. 2005	LAA	73	105	150
	Laguna del Hunco, Patagonia – LH4	EECO	-50.4	-48.6	Wilf et al. 2005	LAA	87	125	179
	Laguna del Hunco, Patagonia – LH6	EECO	-50.4	-48.6	Wilf et al. 2005	LAA	78	112	160
	Laguna del Hunco	c. 52	-50.4	-48.6	Hinojosa et al. 2005	LAA	117	194	320
	Caleta Cocholgue, Chile	Early Eocene	-44.6	-53.7	Gayo et al. (2005)	LAA	91	263	367	Tropical forest inferred based on the leaf physiognomy.
	Ligorio Marquez, Chile	Paleocene-Middle Eocene	-54.7	-51.2	Hinojosa et al. (2006)	LAA	95	157	259
	Ligorio Marquez, Chile	Paleocene-Middle Eocene	-54.7	-51.2	Hinojosa et al. (2005)	LAA	213	153	252
	Concepcion-Arauco, Chile	Paleocene/Eocene	-45.1	-53.8	Hinojosa et al. (2005)	LAA	123	203	335
	Cerrejon, Colombia	c.58	1.9	-57.3	Wing et al. 2009	LAA	226	324	464	Neotropical forest. Paleolatitude of ~5°N stated in paper.
	Europe
	Geiseltal	Lutetian	48	8.5	Mosbrugger et al. (2005)	NLR-CA	100		209	Shallow marine/continental setting.
	Messel Formation, Darmstadt, DE	c. 47	46.3	6	Grein et al. 2011	NLR-CA	80		254	Maar lake infilling.
	Nelson Field, central North Sea. 22/11-N1 Well.	PETM	53.1	-2.8	Eldrett et al. 2014	NLR: BA	107	124	141	Central estimate from 10th and 90th percentiles. Error bars represent mean range. Climate estimate for adjacent landmasses – wind/river deposition on shelf.
	Nelson Field, central North Sea. 22/11-N1 Well.	PETM	53.1	-2.8	Eldrett et al. 2014	NLR: MCR	121	131	141
	Yozgat-Sorgun, Turkey	Middle-late Eocene	39.6	33.5	Akkiraz et al. 2007	NLR:CA	100		152	Possible freshwater swamp environment.
	Australia and New Zealand
	Konkon-1, Bass Basin, SE Australia	Early Eocene	-57.9	147	Contreras et al. 2014	NLR: Bioclimatic	192	200	208	Errors mean +/- standard error. Shallow, restricted marine conditions, runoff from nearby shores.
	ODP Site 1172	Early Eocene	-61.9	156.1	Contreras et al. 2014	NLR: Bioclimatic	169	182	195
	Burong-1/Kingfish-8, Gippsland Basin	Early Eocene	-56.7	150.2	Contreras et al. 2014	NLR: Bioclimatic	194	200	206
	Mid Waipara River	51.6	-54	-164.7	Pancost et al. 2013	NLR: Bioclim	70	126	182	NLR-BA +/- standard error; BLR-CA = +/- ½ range. Upper bathyal deposition linked to basinal subsidence. Proximal to land.
	Mid Waipara River	51.6	-54	-164.7	Pancost et al. 2013	NLR: CA	132	142	152
	Mid Waipara River	51.3	-54	-164.7	Pancost et al. 2013	NLR: Bioclim	54	118	182
	Mid Waipara River	51.3	-54	-164.7	Pancost et al. 2013	NLR: CA	132	142	152
	Otaio Gorge	55.5	-55	-167.4	Pancost et al. 2013	NLR-BA	66	114	162	Errors as above. Possible estuarine environment.
	Otaio Gorge	55.5	-55	-167.4	Pancost et al. 2013	NLR-CA	101	109	117
	Hotham Heights, SE Australia	EECO	-55.5	149.1	Greenwood et al. 2003	NLR–BA (pollen and leaves)	150	195	240	Mean of 25 and 75th percentiles for NLR calibration. Early Eocene sites may have been > 1400 m.
	Dean’s Marsh, SE Australia	Early/Mid	-57.3	145	Greenwood et al. 2003	NLR-BA (pollen and leaves)	146	186	226
	Brandy Creek, SE Australia	EECO	-55.5	149.1	Greenwood et al. 2003	NLR – Bioclimatic (pollen and leaves)	148	191	234
	China
	Guchengzi Formation, Fushun, China	Early Eocene	50.1	127.6	Wang et al. (2010)	NLR-CA	65		154
	Guchengzi Formation, Fushun, China, assemblage c	Early Eocene	50.1	127.6	Quan et al. 2011	NLR-CA	37		121
	Guchengzi Formation, Fushun, China, assemblage d	Early Eocene	50.1	127.6	Quan et al. 2011	NLR-CA	104		136
	Guchengzi Formation, Fushun, China, assemblage e	Early Eocene	50.1	127.6	Quan et al. 2011	NLR-CA	90		136
	Changchang Formation, Hainan Island, South China	Early-Middle Eocene	25.8	116.9	Yao et al. (2009)	NLR-CA	78		111
	Xian’ancun, Yilan, Heilongijiang	Early Eocene	53.5	132.9	Quan et al. (2012)	NLR-CA (pollen)	104		136
	Bahuli, Hualin, Heilongjiang	Early Eocene	52.7	133.9	Quan et al. (2012)	NLR-CA (pollen)	96		158
	Bangchuigou, Shulan, Jilin	Early Eocene	51.8	130.2	Quan et al. (2012)	NLR-CA (pollen)	118		136
	Guchengzi, Fushun, Liaoning	Early Eocene	50	127.4	Quan et al. (2012)	NLR-CA (pollen)	104		136
	Shahejie (Part IV) Huanghua, Hebei	Early Eocene	45.5	119.4	Quan et al. (2012)	NLR-CA (pollen)	112		130
	Wutu, Changle, Shandong	Early Eocene	45.2	121.1	Quan et al. (2012)	NLR-CA (pollen)	74		121
	Dainan, Gaoyou, Jiangsu	Early Eocene	40.8	121.2	Quan et al. (2012)	NLR-CA (pollen)	118		121
	Dingyuan (Part III), Hefei Basin, Anhui	Early Eocene	40.4	119.5	Quan et al. (2012)	NLR-CA (pollen)	112		130
	Qingjiang (Part I), Qingjiang, Jiangxi	Early Eocene	35.3	119.7	Quan et al. (2012)	NLR-CA (pollen)	112		115
	Oujiang, Donghai, Zhejiang	Early Eocene	35.3	126.1	Quan et al. (2012)	NLR-CA (pollen)	112		136
	Xingouzui, Jianghan Basin, Hubei	Early Eocene	36.7	115.3	Quan et al. (2012)	NLR-CA (pollen)	90		129
	Tantou (lower), Luanchuan, Henan	Early Eocene	41.1	112.9	Quan et al. (2012)	NLR-CA (pollen)	90		130
	Xiangcheng (Part IV), Lingbao, Henan	Early Eocene	41.8	112	Quan et al. (2012)	NLR-CA (pollen)	112		130
	Unnamed unit 1 (lower), Etuoke, Inner Mongolia	Early Eocene	45.9	109	Quan et al. (2012)	NLR-CA (pollen)	112		130
	Unnamed unit 2 (lower), Lanzhou, Gansu	Early Eocene	42.1	105.4	Quan et al. (2012)	NLR-CA (pollen)	112		121
	Qijiachuan (parts III – IV), Xining, Qinghai	Early Eocene	42.3	103	Quan et al. (2012)	NLR-CA (pollen)	90		136
	Kalater, Shache Basin, Xinjiang	Early Eocene	41.6	77.1	Quan et al. (2012)	NLR-CA (pollen)	82		163
	Lufeng, Zhujiang Basin, Guangdong	Early Eocene	29.4	118.7	Quan et al. (2012)	NLR-CA (pollen)	112		136
	Hefei	Early Eocene	40.34	119.605	Wang et al. 2013	NLR-CA (pollen)	79	109	139
	Nanling	Early Eocene	38.7	120.8	Wang et al. 2013	NLR-CA (pollen)	82	110	139
	Tianchang	Early Eocene	40.6	120.8	Wang et al. 2013	NLR-CA (pollen)	82	110	139
	Wuhu	Early Eocene	39.1	120.7	Wang et al. 2013	NLR-CA (pollen)	79	109	139
	Bohai Sea	Early Eocene	46.5	121.8	Wang et al. 2013	NLR-CA (pollen)	113	126	139
	Donghai	Early Eocene	35	126.5	Wang et al. 2013	NLR-CA (pollen)	88	133	179
	Fushun	Early Eocene	49.2	126	Wang et al. 2013	NLR-CA (pollen)	79	109	139
	Longgui	Early Eocene	29.8	118.5	Wang et al. 2013	NLR-CA (pollen)	82	110	139
	Tantou Basin	Early Eocene	41.1	112.9	Wang et al. 2013	NLR-CA (pollen)	87	113	139
	Dalianhe	Early Eocene	53.7	133.2	Wang et al. 2013	NLR-CA (pollen)	99	119	139
	Jizhong Depression	Early Eocene	46.2	118.5	Wang et al. 2013	NLR-CA (pollen)	99	101	103
	North of Jiangsu	Early Eocene	40.7	121.9	Wang et al. 2013	NLR-CA (pollen)	82	110	139
	Chijiang	Early Eocene	32.4	118.8	Wang et al. 2013	NLR-CA (pollen)	82	110	139
	Leizhou Peninsula	Early Eocene	26.5	116.1	Wang et al. 2013	NLR-CA (pollen)	82	124	165
	South China Sea	Early Eocene	25.9	115.8	Wang et al. 2013	NLR-CA (pollen)	148	168	19
	Xining	Early Eocene	42.7	103.7	Wang et al. 2013	NLR-CA (pollen)	82	110	139
	Three Gorges	Early Eocene	36.2	114.4	Wang et al. 2013	NLR-CA (pollen)	87	95	103
	Changle	Early Eocene	45.2	120.7	Wang et al. 2013	NLR-CA (pollen)	87	113	139
	Shache	Early Eocene	42.1	75.6	Wang et al. 2013	NLR-CA (pollen)	78	108	139
	Nanxiang Basin	Early Eocene	36.9	112.9	Wang et al. 2013	NLR-CA (pollen)	87	113	139
	Zhokou Basin	Early Eocene	41.9	116.4	Wang et al. 2013	NLR-CA (pollen)	82	110	139
	Kashi	Early Eocene	42.6	75.5	Wang et al. 2013	NLR-CA (pollen)	65	84	103
	Kuche	Early Eocene	45.6	82.2	Wang et al. 2013	NLR-CA (pollen)	79	109	139
	Africa
	Mahenge – All Data, taza split	c. 46	-11.2	34.6	Jacobs and Herendeen (2004)	LAA	71	75	79	Calibration for Tropical Africa and Bolivia.
	Mahenge – All Data, taza split	c. 46	-11.2	34.6	Jacobs and Herendeen (2004)	LAA	61	64	68	Calibration including additional tropical-subtropical western hemisphere sites.
	Mahenge – L7 Data	c. 46	-11.2	34.6	Jacobs and Herendeen (2004)	LAA	72	76	80	Infilling of crater lake environment in possibly dry, woodland environment.
	Mahenge – L7 Data	c. 46	-11.2	34.6	Jacobs and Herendeen (2004)	LAA	63	66	69
	Mahenge	c. 46	-11.2	34.6	Kaiser et al. (2006)	LAA	61	64	68
	Mahenge	c. 46	-11.2	34.6	Kaiser et al. (2006)	LAA	74	78	82
	Antarctica
	Wilkes Land Sector, IODP U1356	53.6 – 51.9	-70.7	145.1	Pross et al. 2012	NLR: Bioclim	96	176	256	Estimate based on temperate flora. For bioclimatic estimate, +/- standard error.
	Wilkes Land Sector, IODP U1356	53.6 – 51.9	-70.7	145.1	Pross et al. 2012	NLR: CA	103	170	238	Estimate based on temperate flora.
	Wilkes Land Sector, IODP U1356	53.6 – 51.9	-70.7	145.1	Pross et al. 2012	NLR: Bioclim	99	169	239	Estimate based on temperate flora, > 90. For bioclimatic estimate, +/- standard error.
	Wilkes Land Sector, IODP U1356	53.6 – 51.9	-70.7	145.1	Pross et al. 2012	NLR: CA	107	163	219	Estimate based on temperate flora, > 90
	Wilkes Land Sector, IODP U1356	53.6 – 51.9	-70.7	145.1	Pross et al. 2012	NLR: Bioclim	76	153	231	Estimate based on paratropical flora. For bioclimatic estimate, +/- standard error.
	Wilkes Land Sector, IODP U1356	53.6 – 51.9	-70.7	145.1	Pross et al. 2012	NLR: CA	69	146	222	Estimate based on paratropical flora.
	Wilkes Land Sector, IODP U1356	53.6 – 51.9	-70.7	145.1	Pross et al. 2012	NLR: Bioclim	79	133	188	Estimate based on paratropical flora, > 90. For bioclimatic estimate, +/- standard error.
	Wilkes Land Sector, IODP U1356	53.6 – 51.9	-70.7	145.1	Pross et al. 2012	NLR: CA	74	121	166	Estimate based on paratropical flora, > 90
	Dragon Glacier Flora	44 – 49	-66.6	-46.8	Hunt and Poole, 2003	LAA	73	104	149	+/- standard error. Fluvio-lacustrine deposition. Minimum value; fragments up to 14 cm long, 10 cm wide noted in the samples. Attenunated apices of ~10% leaves suggest moderate moisture. Poole et al. (2005) suggest 89 cmfor the Dragon Glacier Flora.
	Dragon Glacier Flora	44 – 49	-66.6	-46.8	Hunt and Poole, 2003	CLAMP		89
	Dragon Glacier Flora	44 – 49	-66.6	-46.8	Hunt and Poole, 2003	NLR: CA	62		125
	Fossil Hill Flora	44 – 49	-67	-52.2	Cited in Poole et al. 2005	LAA		106
	Fossil Hill Flora	44 – 49	-67	-52.2	Cited in Poole et al. 2005	WP	277	371	465
	Fossil Hill Flora	44 – 49	-67	-52.2	Poole et al. 2005	NLR-CA	65	73	82
	James Ross Basin	Early Eocene	-68.9	-50	Poole et al. 2005	NLR-CA	65	73	82
	James Ross Basin	Early Eocene	-68.9	-50	Poole et al. 2005	WP	295	389	483
